# Supplementary material for: Inhibitory potential of α-Amyrin from Calotropis procera against HIV-1 reverse transcriptase: insights from in silico and in vitro assays
Source: Research Square preprint supplement (doi:10.21203/rs.3.rs-6388308/v1), 2025-06-03
Supplement: Supplementary file 1 [file 1a9e5ebf16970d524919a360.docx]

***Supplementary Figures***


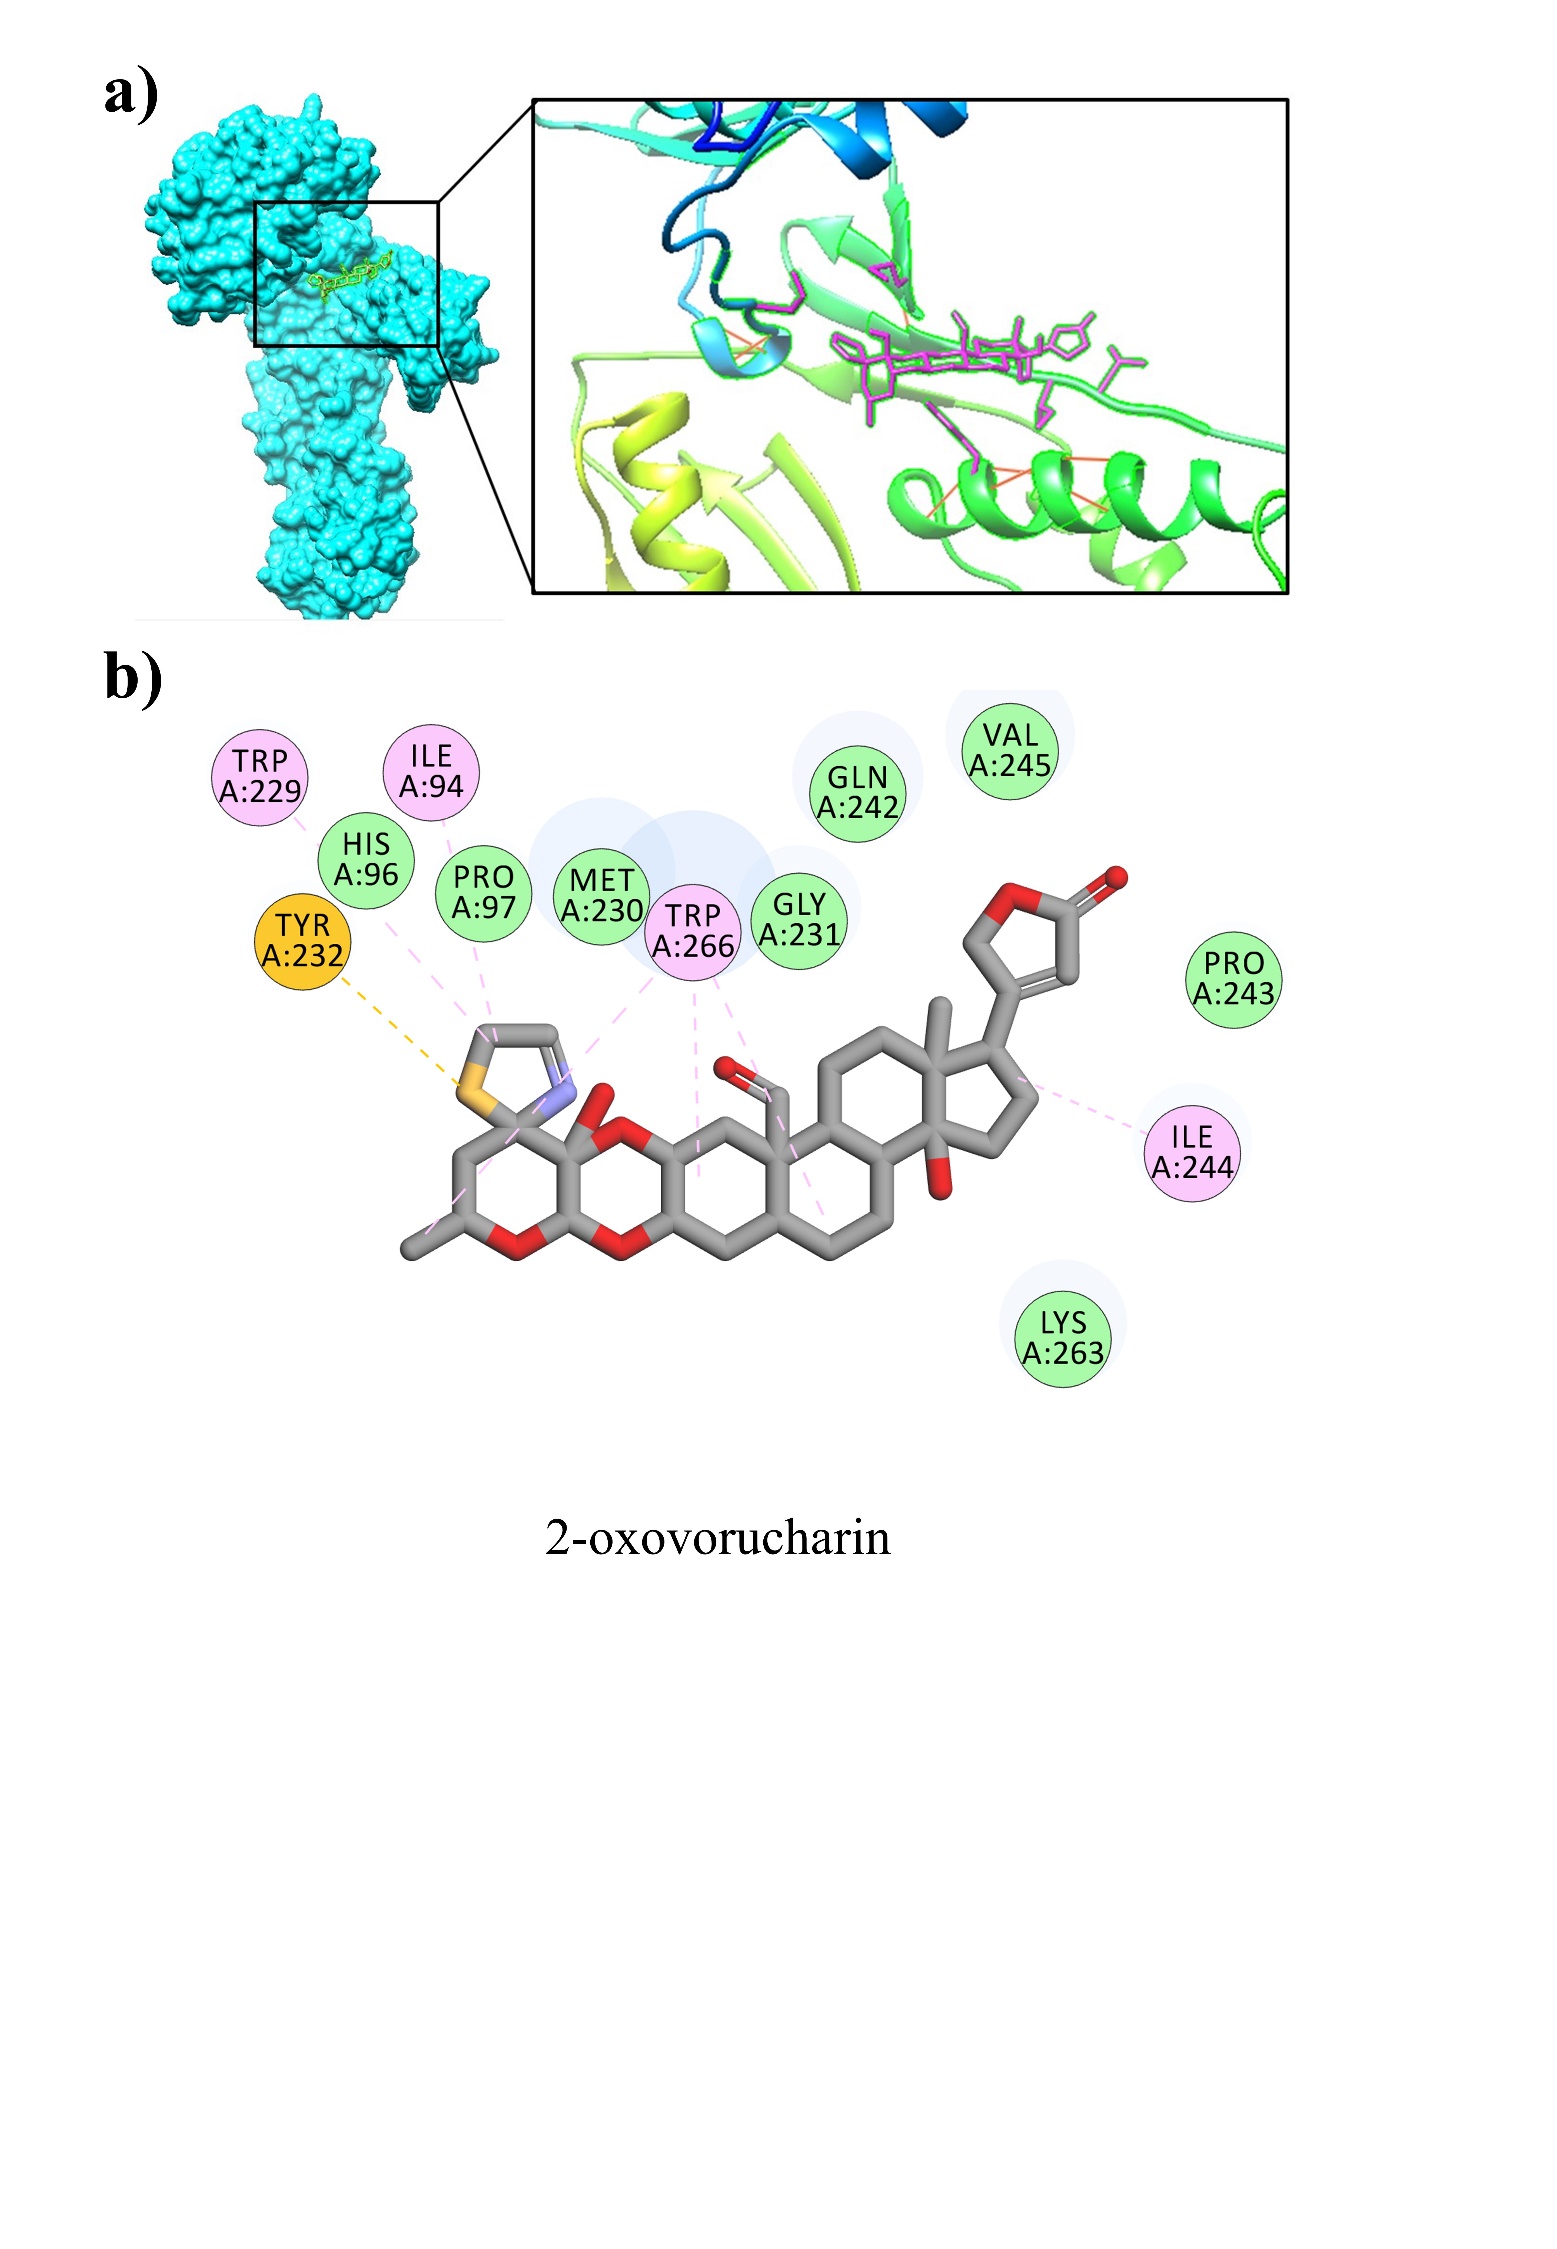


**Supplementary Fig. 1** Binding mode for 2-oxovorucharin with HIV-1 RT

(PDB ID 1JLB)

a) Ligand is shown in "Stick" format and green color whereas the HIV-1 RT is shown in "Surface" format. b) 2D images generated using discovery studio 4.1 Visualizer showing amino acid residues involved in interactions between ligand and enzyme.


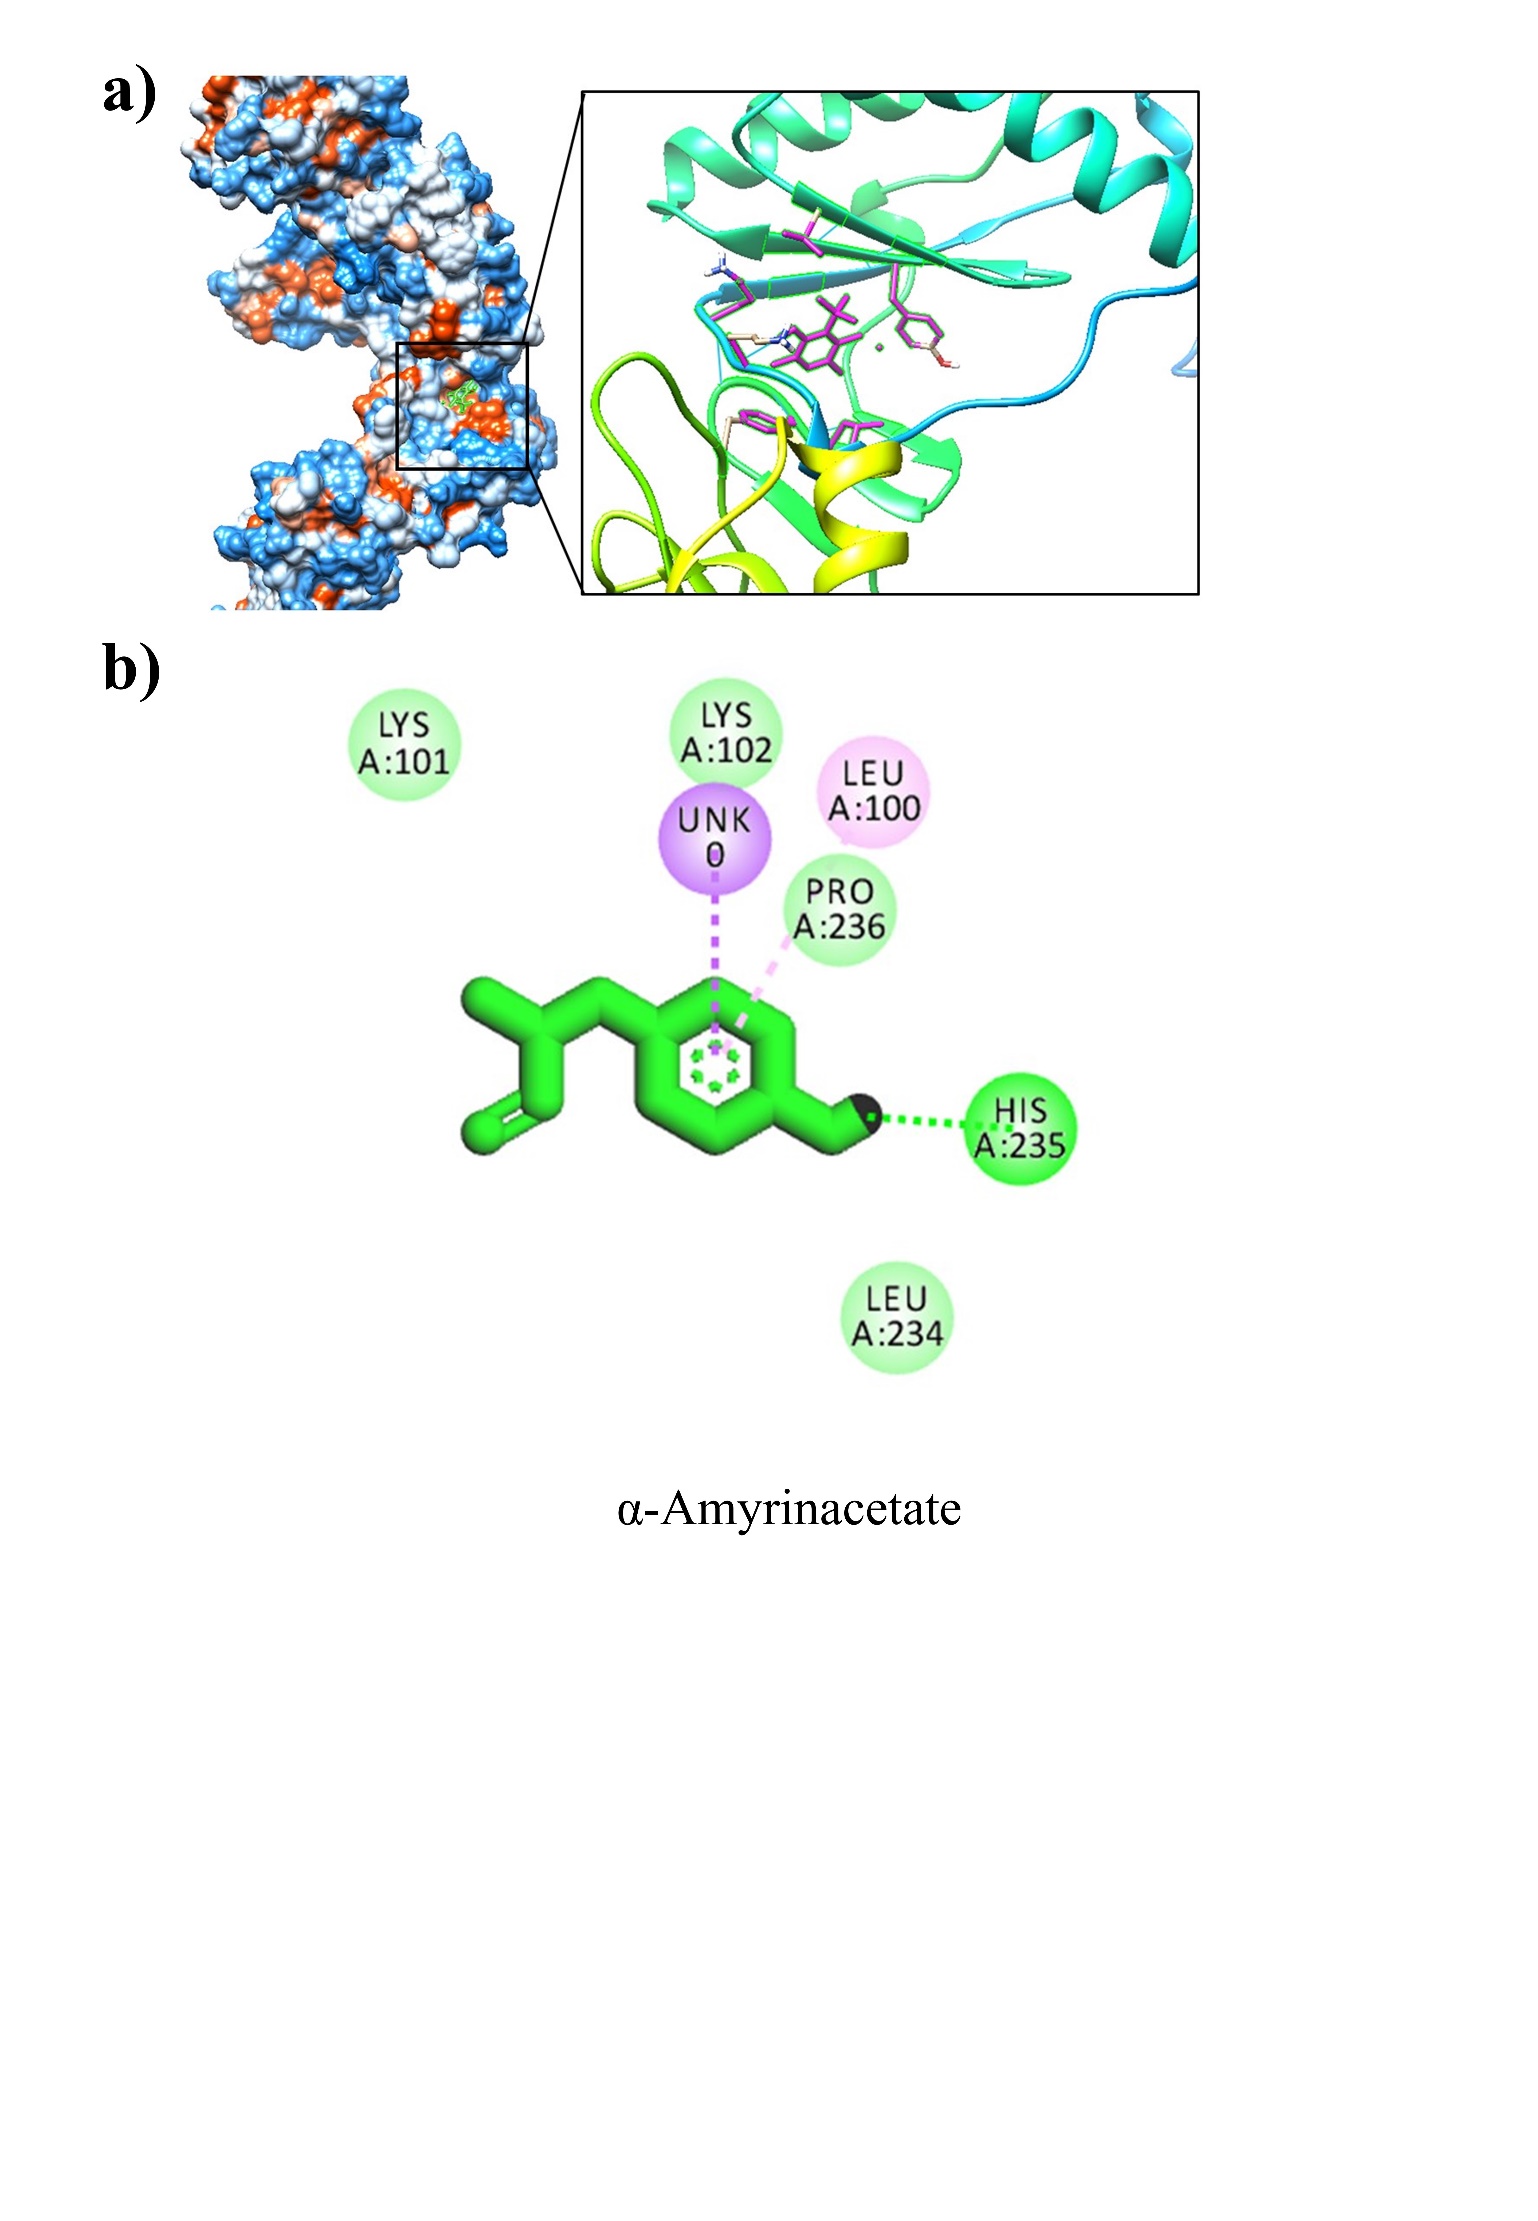


**Supplementary Fig. 2** Binding mode for α-Amyrinacetate with HIV-1 RT (PDB ID 1JLB)

a) Ligand is shown in "Stick" format and green color whereas the HIV-1 RT is shown in "Surface" format. b) 2D images generated using discovery studio 4.1 Visualizer showing amino acid residues involved in interactions between ligand and enzyme.


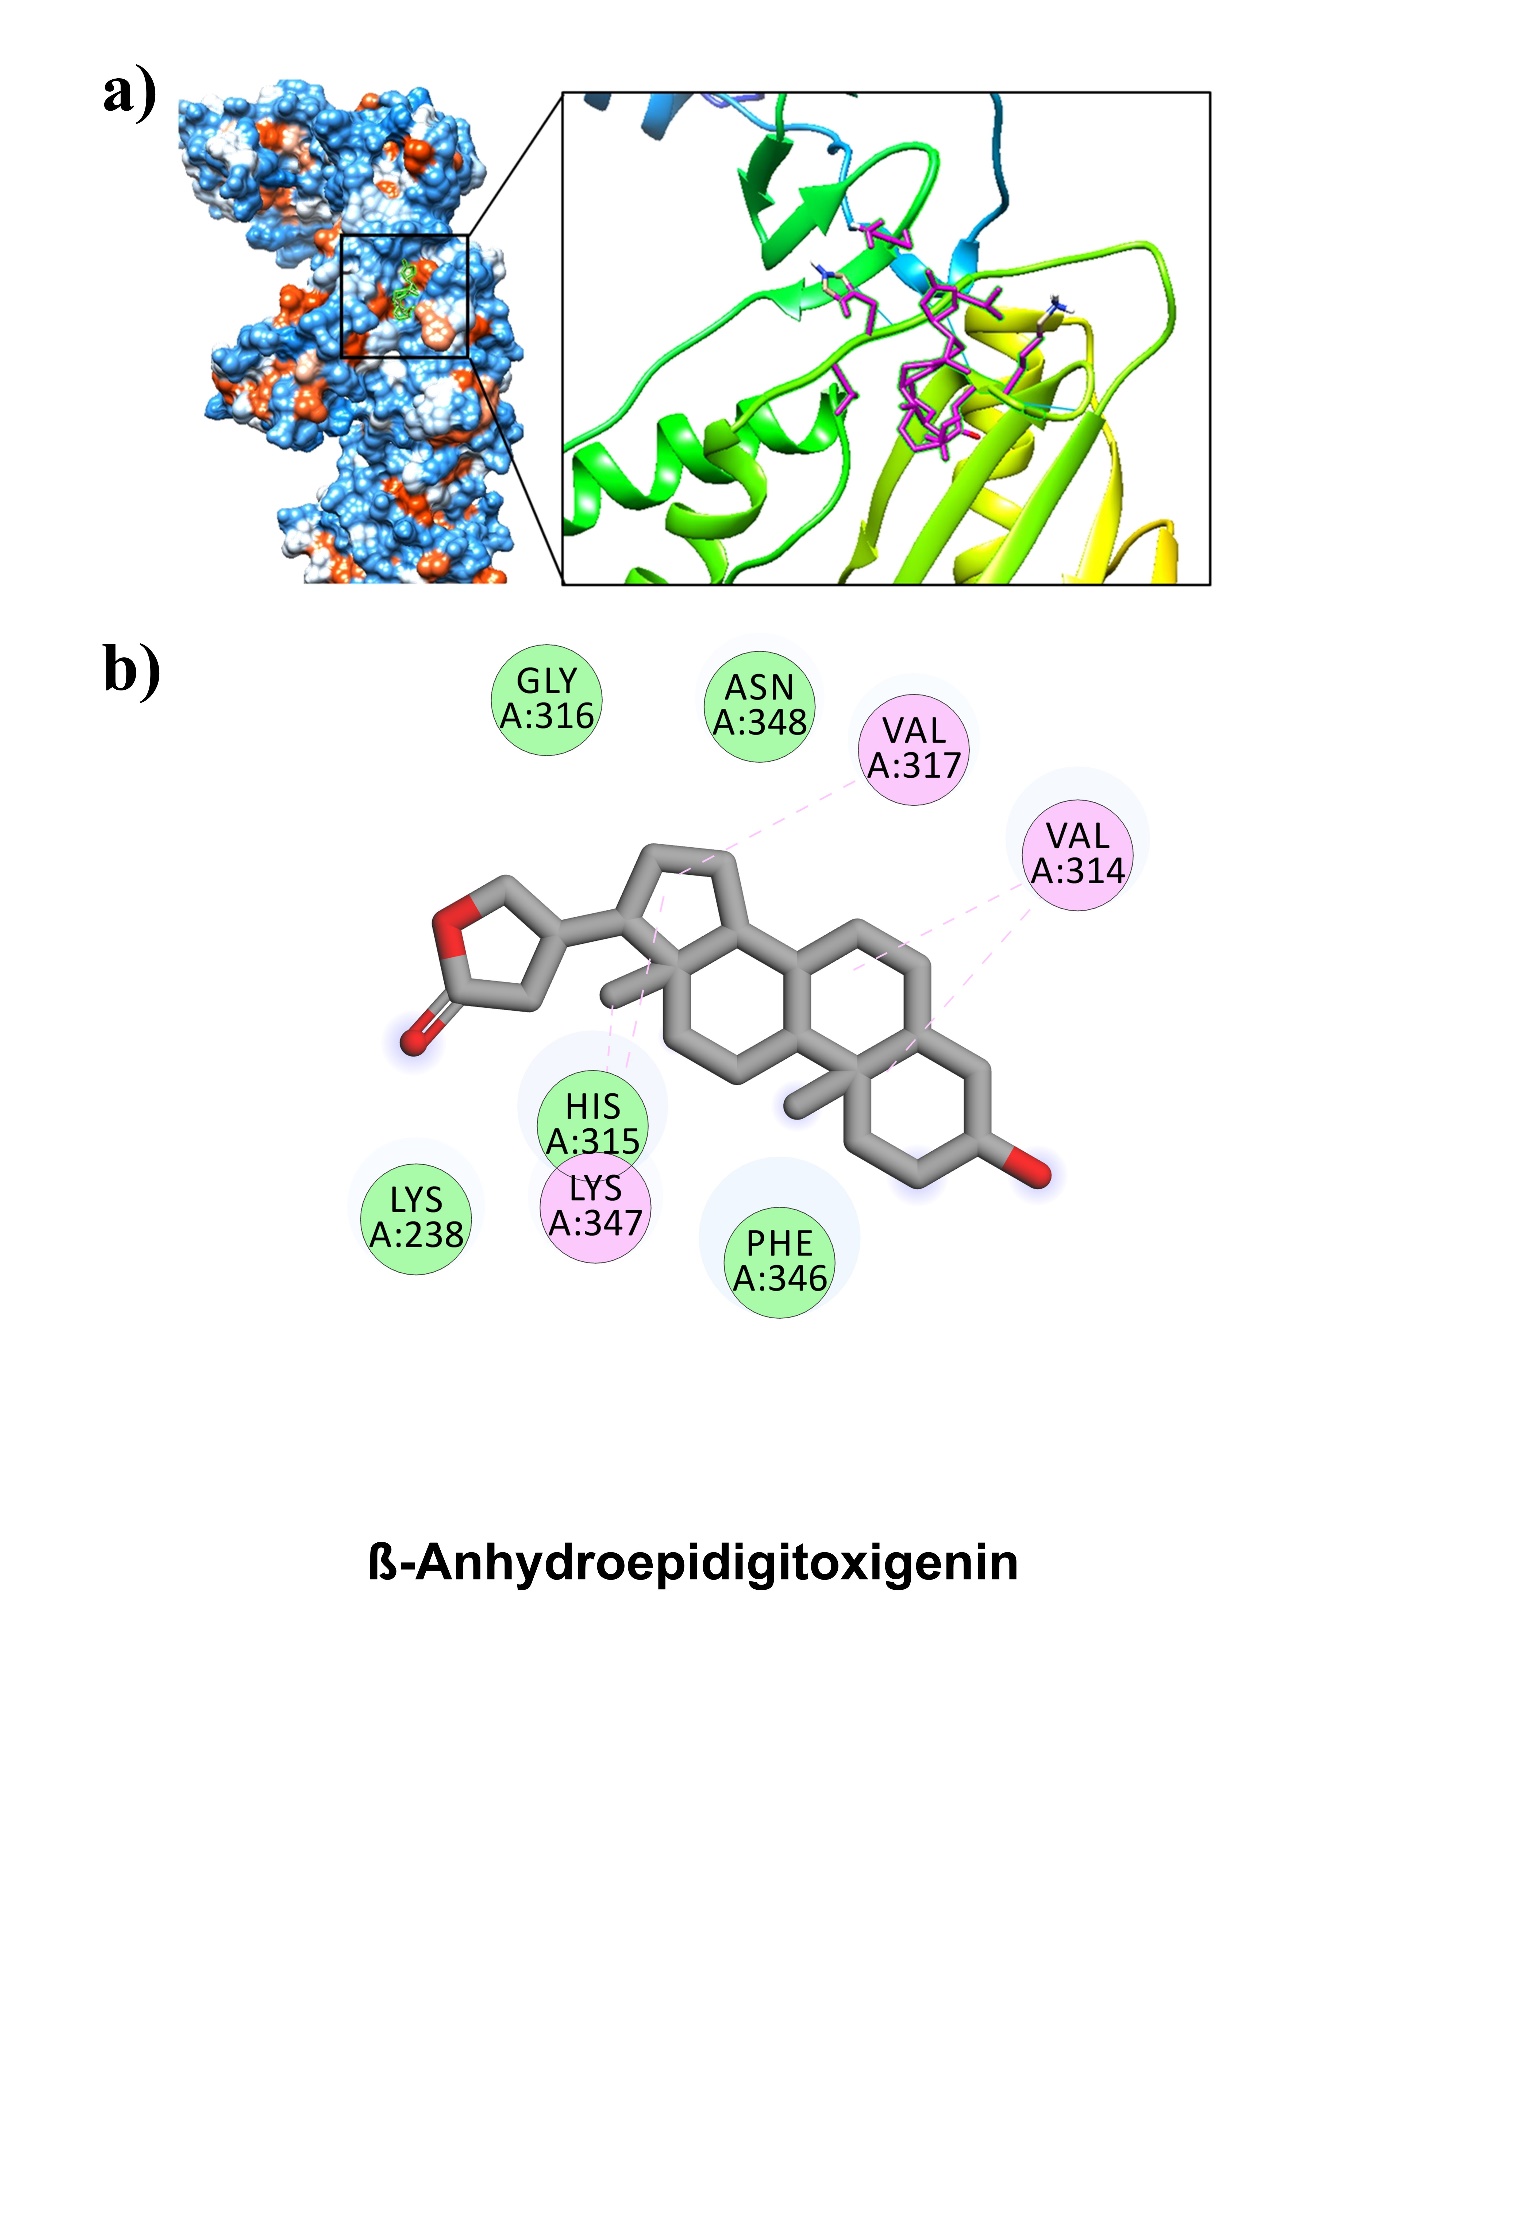


**Supplementary Fig. 3** Binding mode for ß-Anhydroepidigitoxigenin with HIV-1 RT (PDB ID 1JLB)

a) Ligand is shown in "Stick" format and green color whereas the HIV-1 RT is shown in "Surface" format. b) 2D images generated using discovery studio 4.1 Visualizer showing amino acid residues involved in interactions between ligand and enzyme.

**
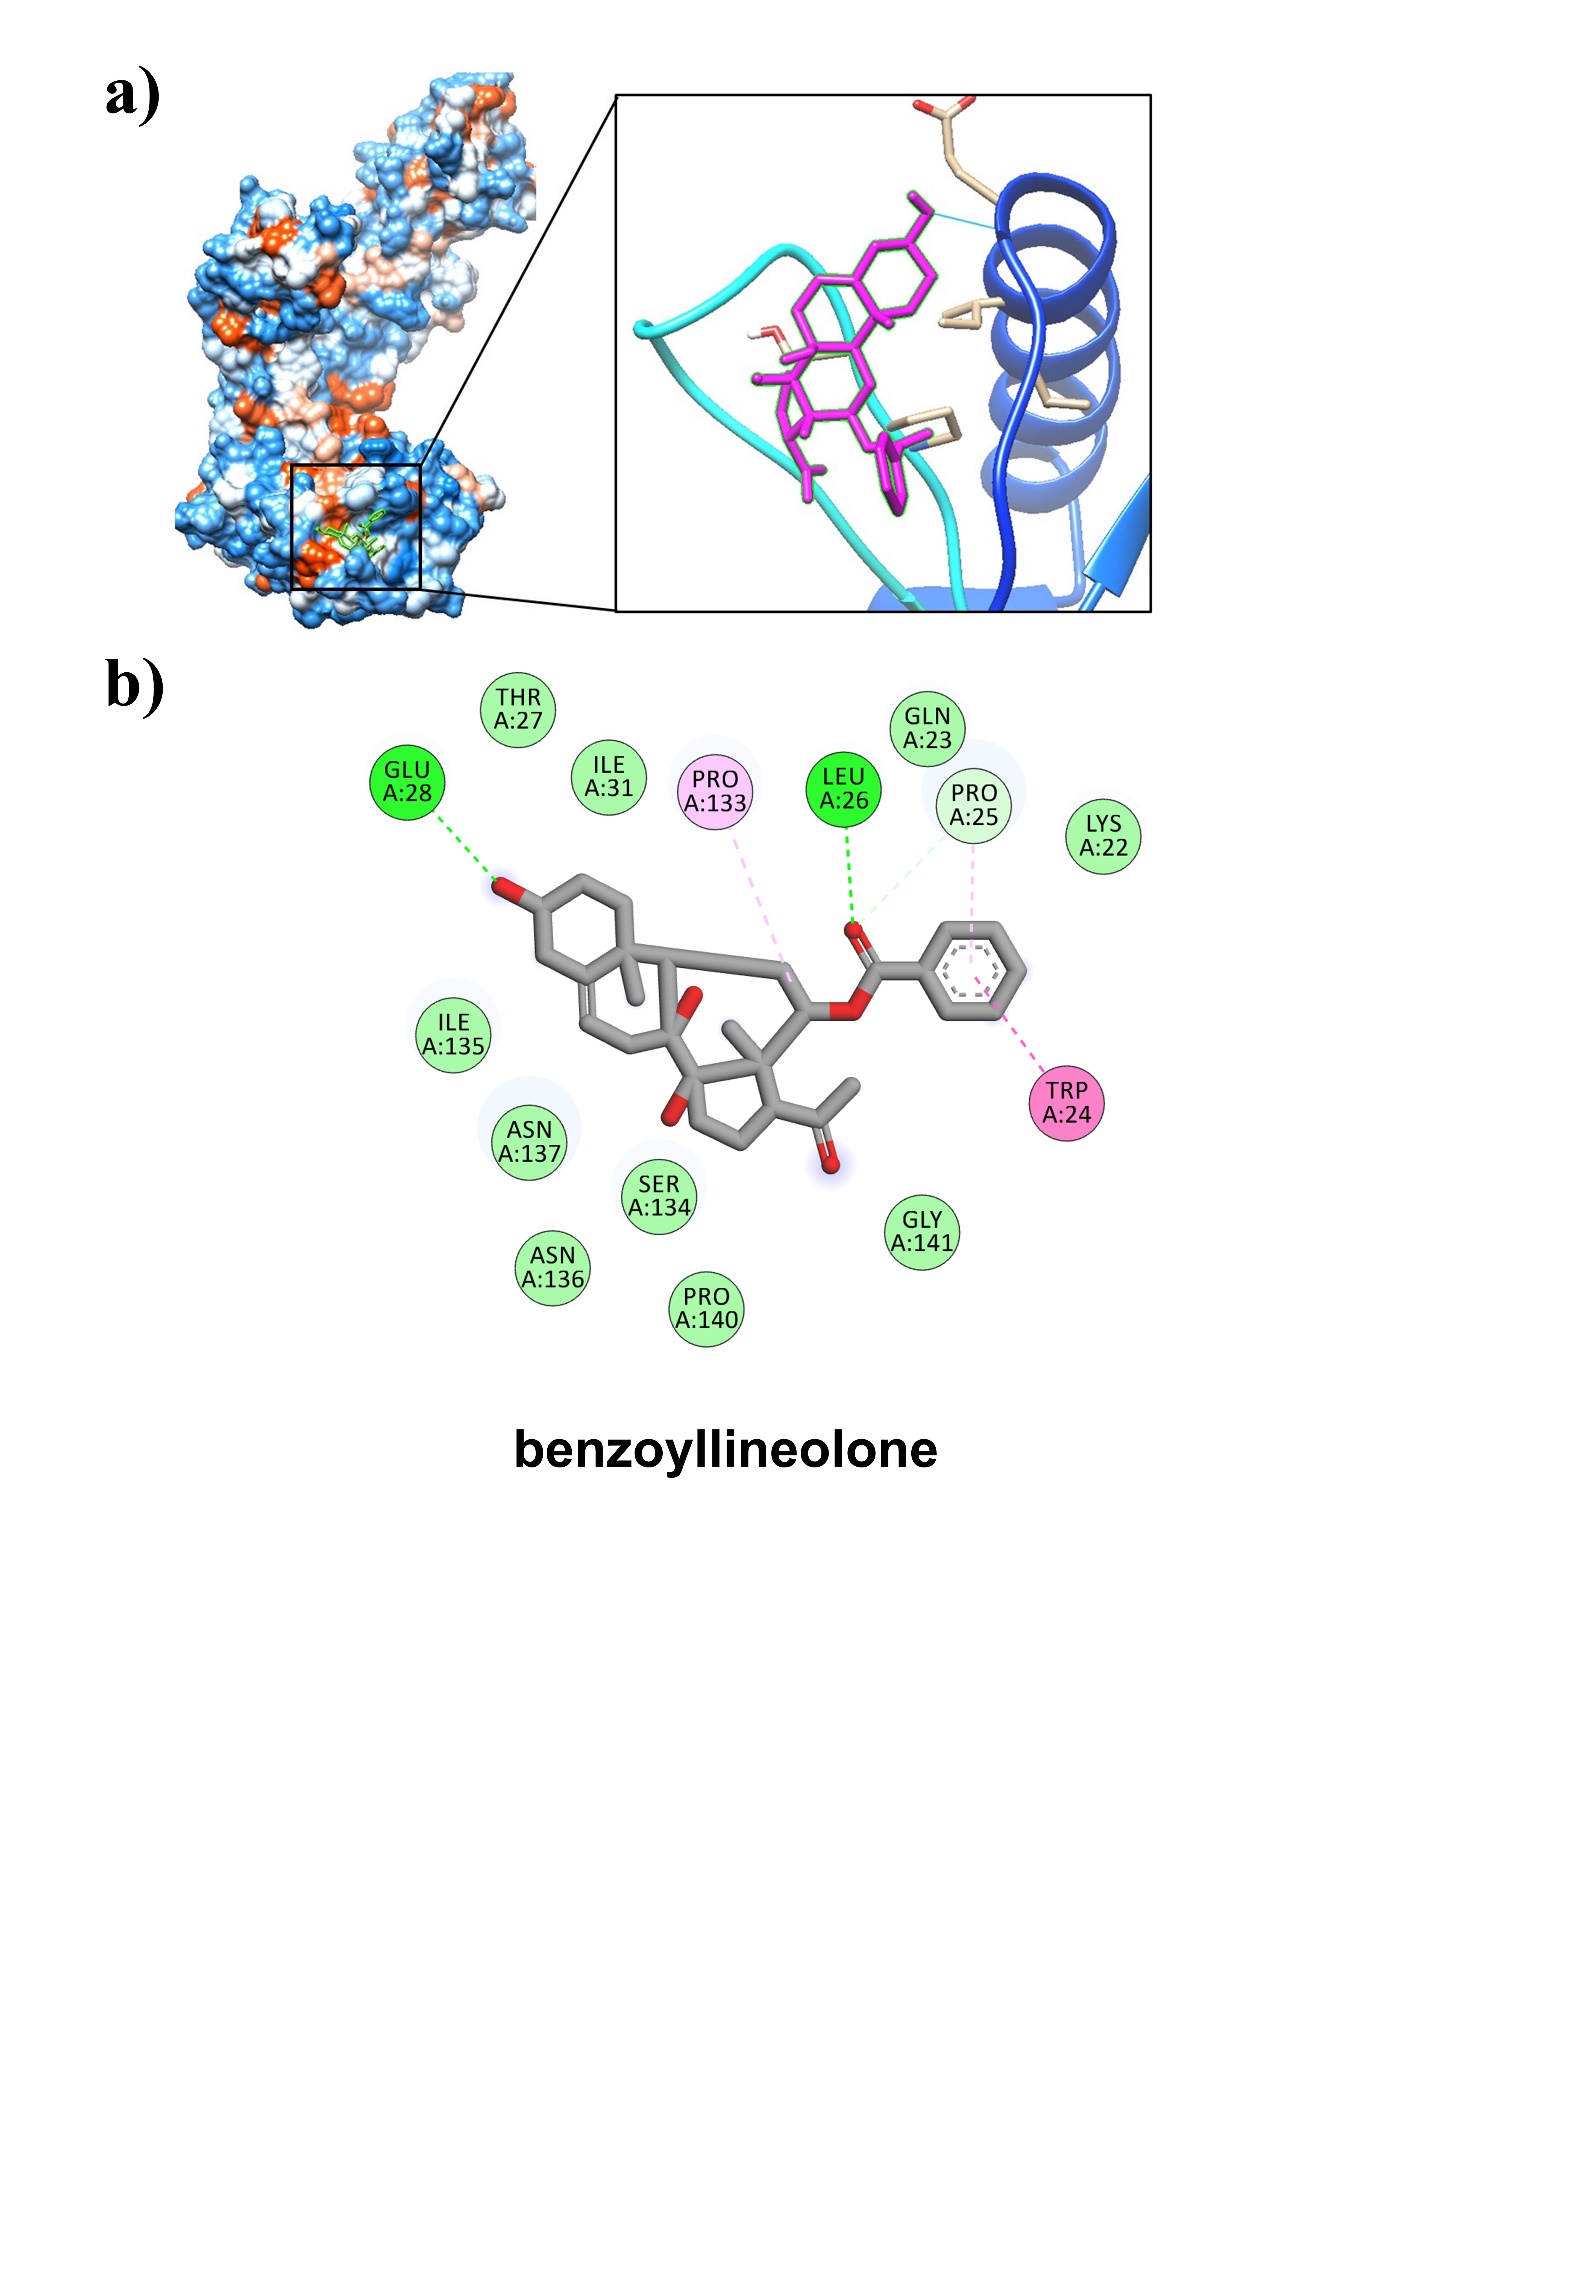
**

**Supplementary Fig. 4** Binding mode for benzoyllineolone with HIV-1 RT (PDB ID 1JLB)

a) Ligand is shown in "Stick" format and green color whereas the HIV-1 RT is shown in "Surface" format. b) 2D images generated using discovery studio 4.1 Visualizer showing amino acid residues involved in interactions between ligand and enzyme.


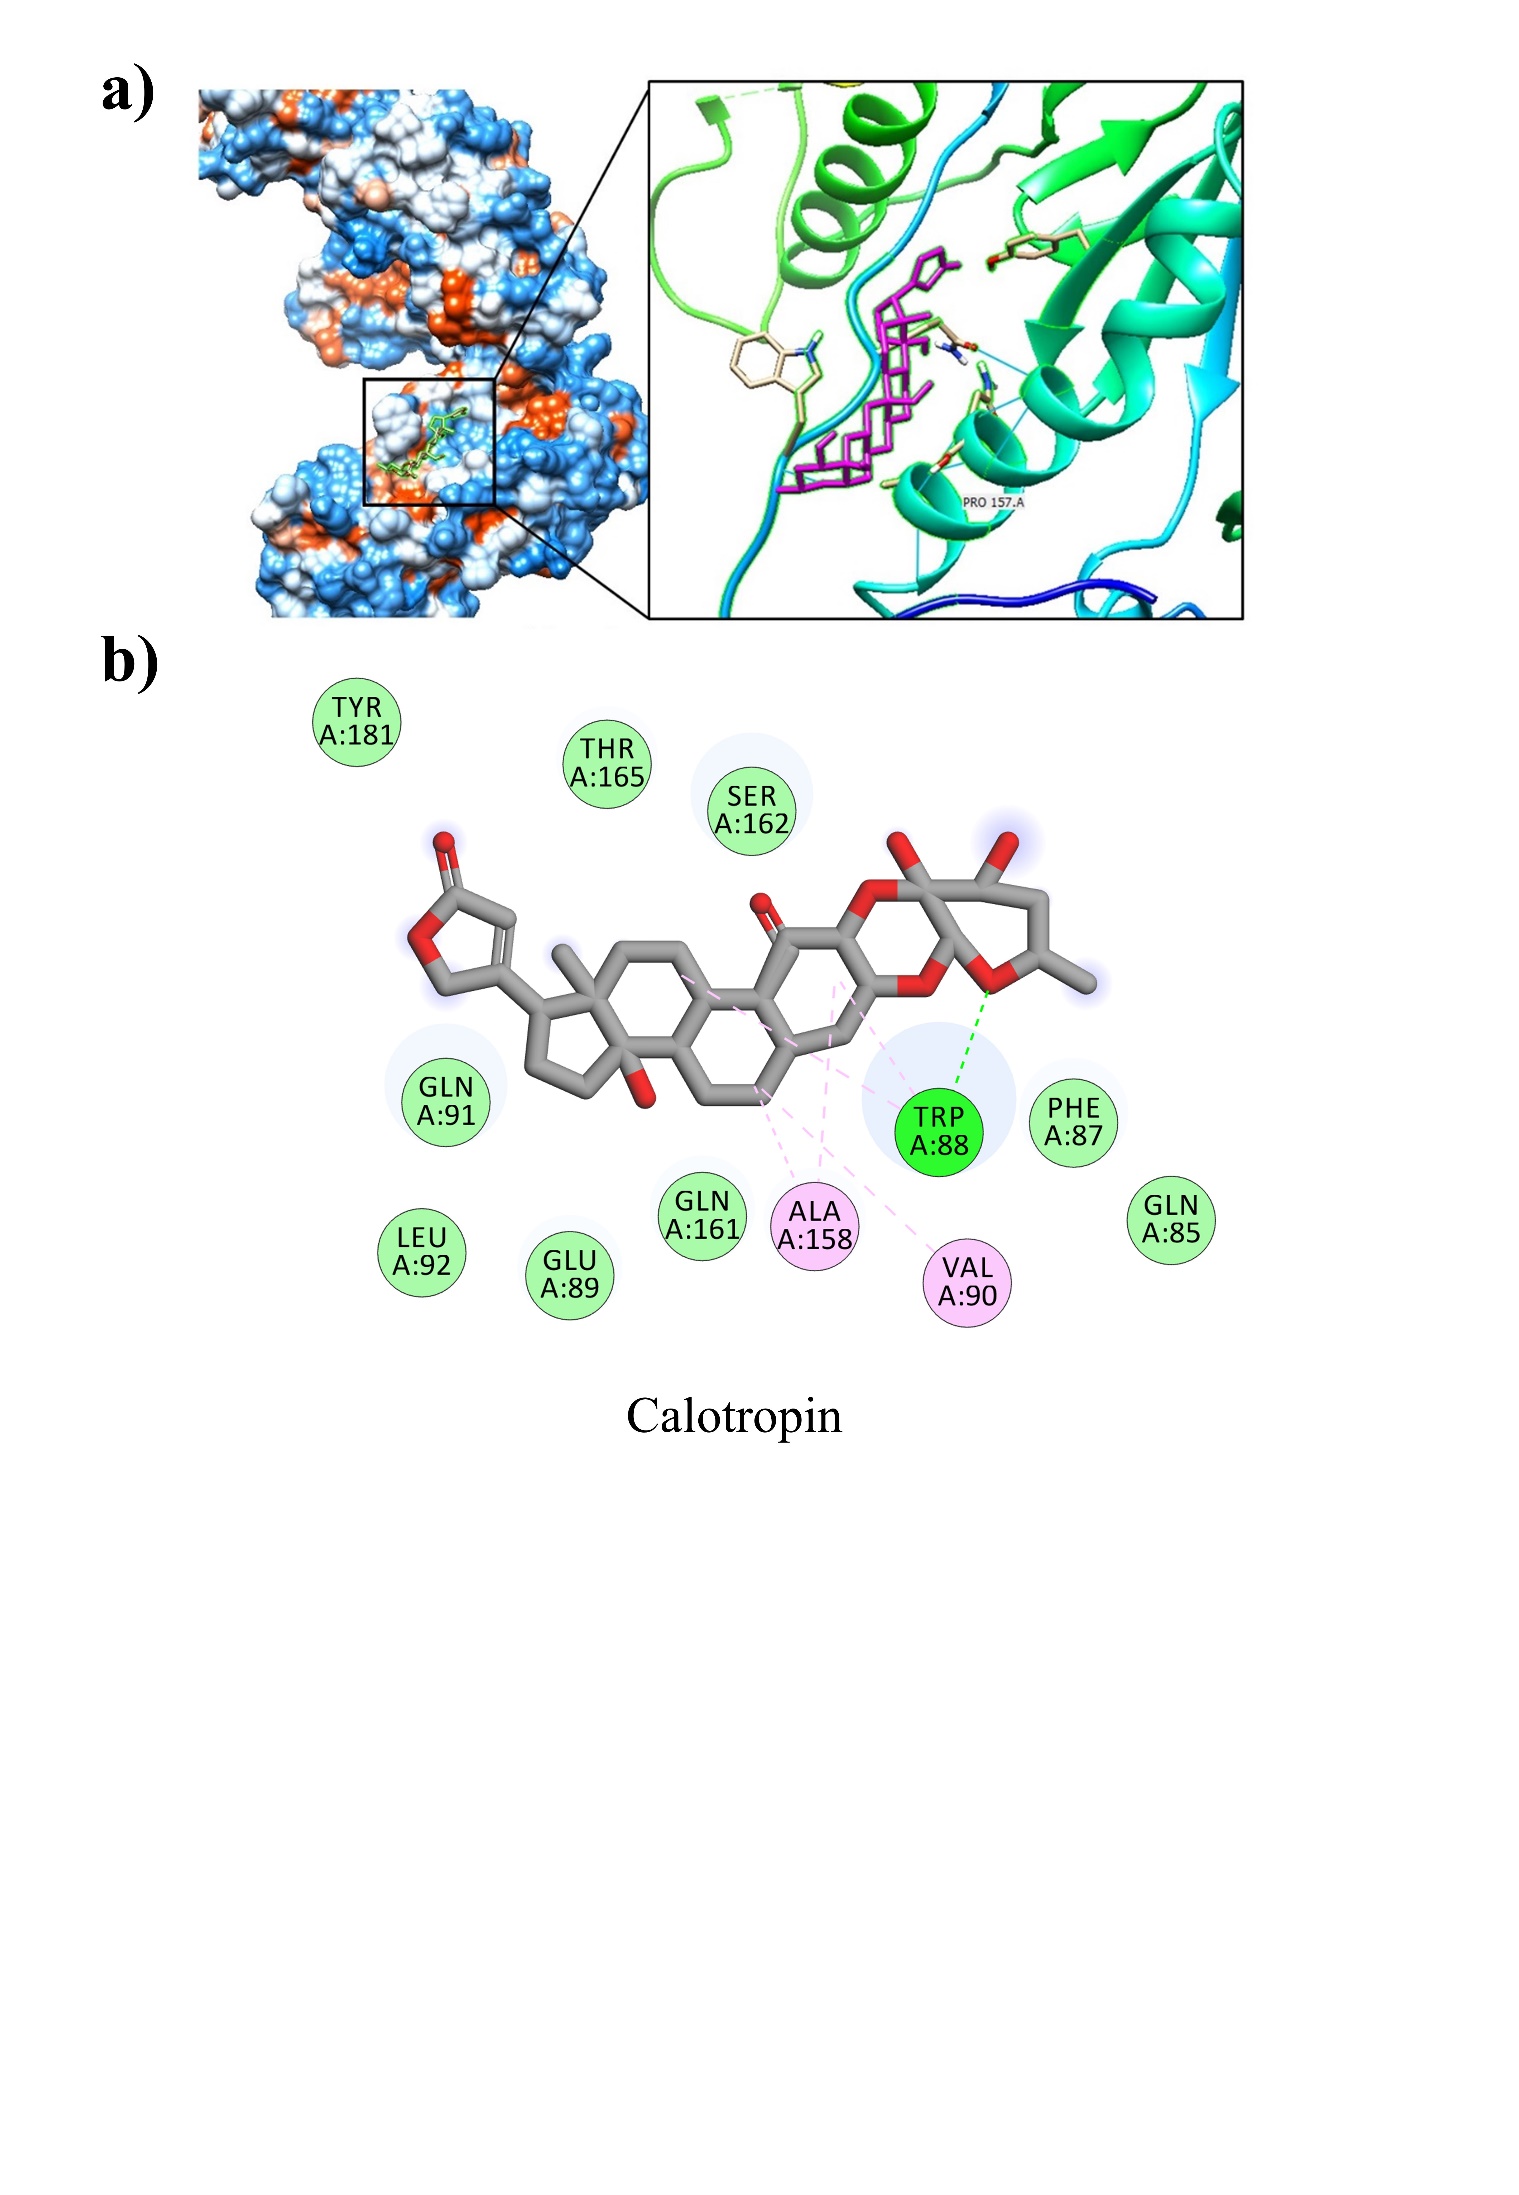


**Supplementary Fig. 5** Binding mode for calotropin with HIV-1 RT (PDB ID 1JLB)

a) Ligand is shown in "Stick" format and green color whereas the HIV-1 RT is shown in "Surface" format. b) 2D images generated using discovery studio 4.1 Visualizer showing amino acid residues involved in interactions between ligand and enzyme.


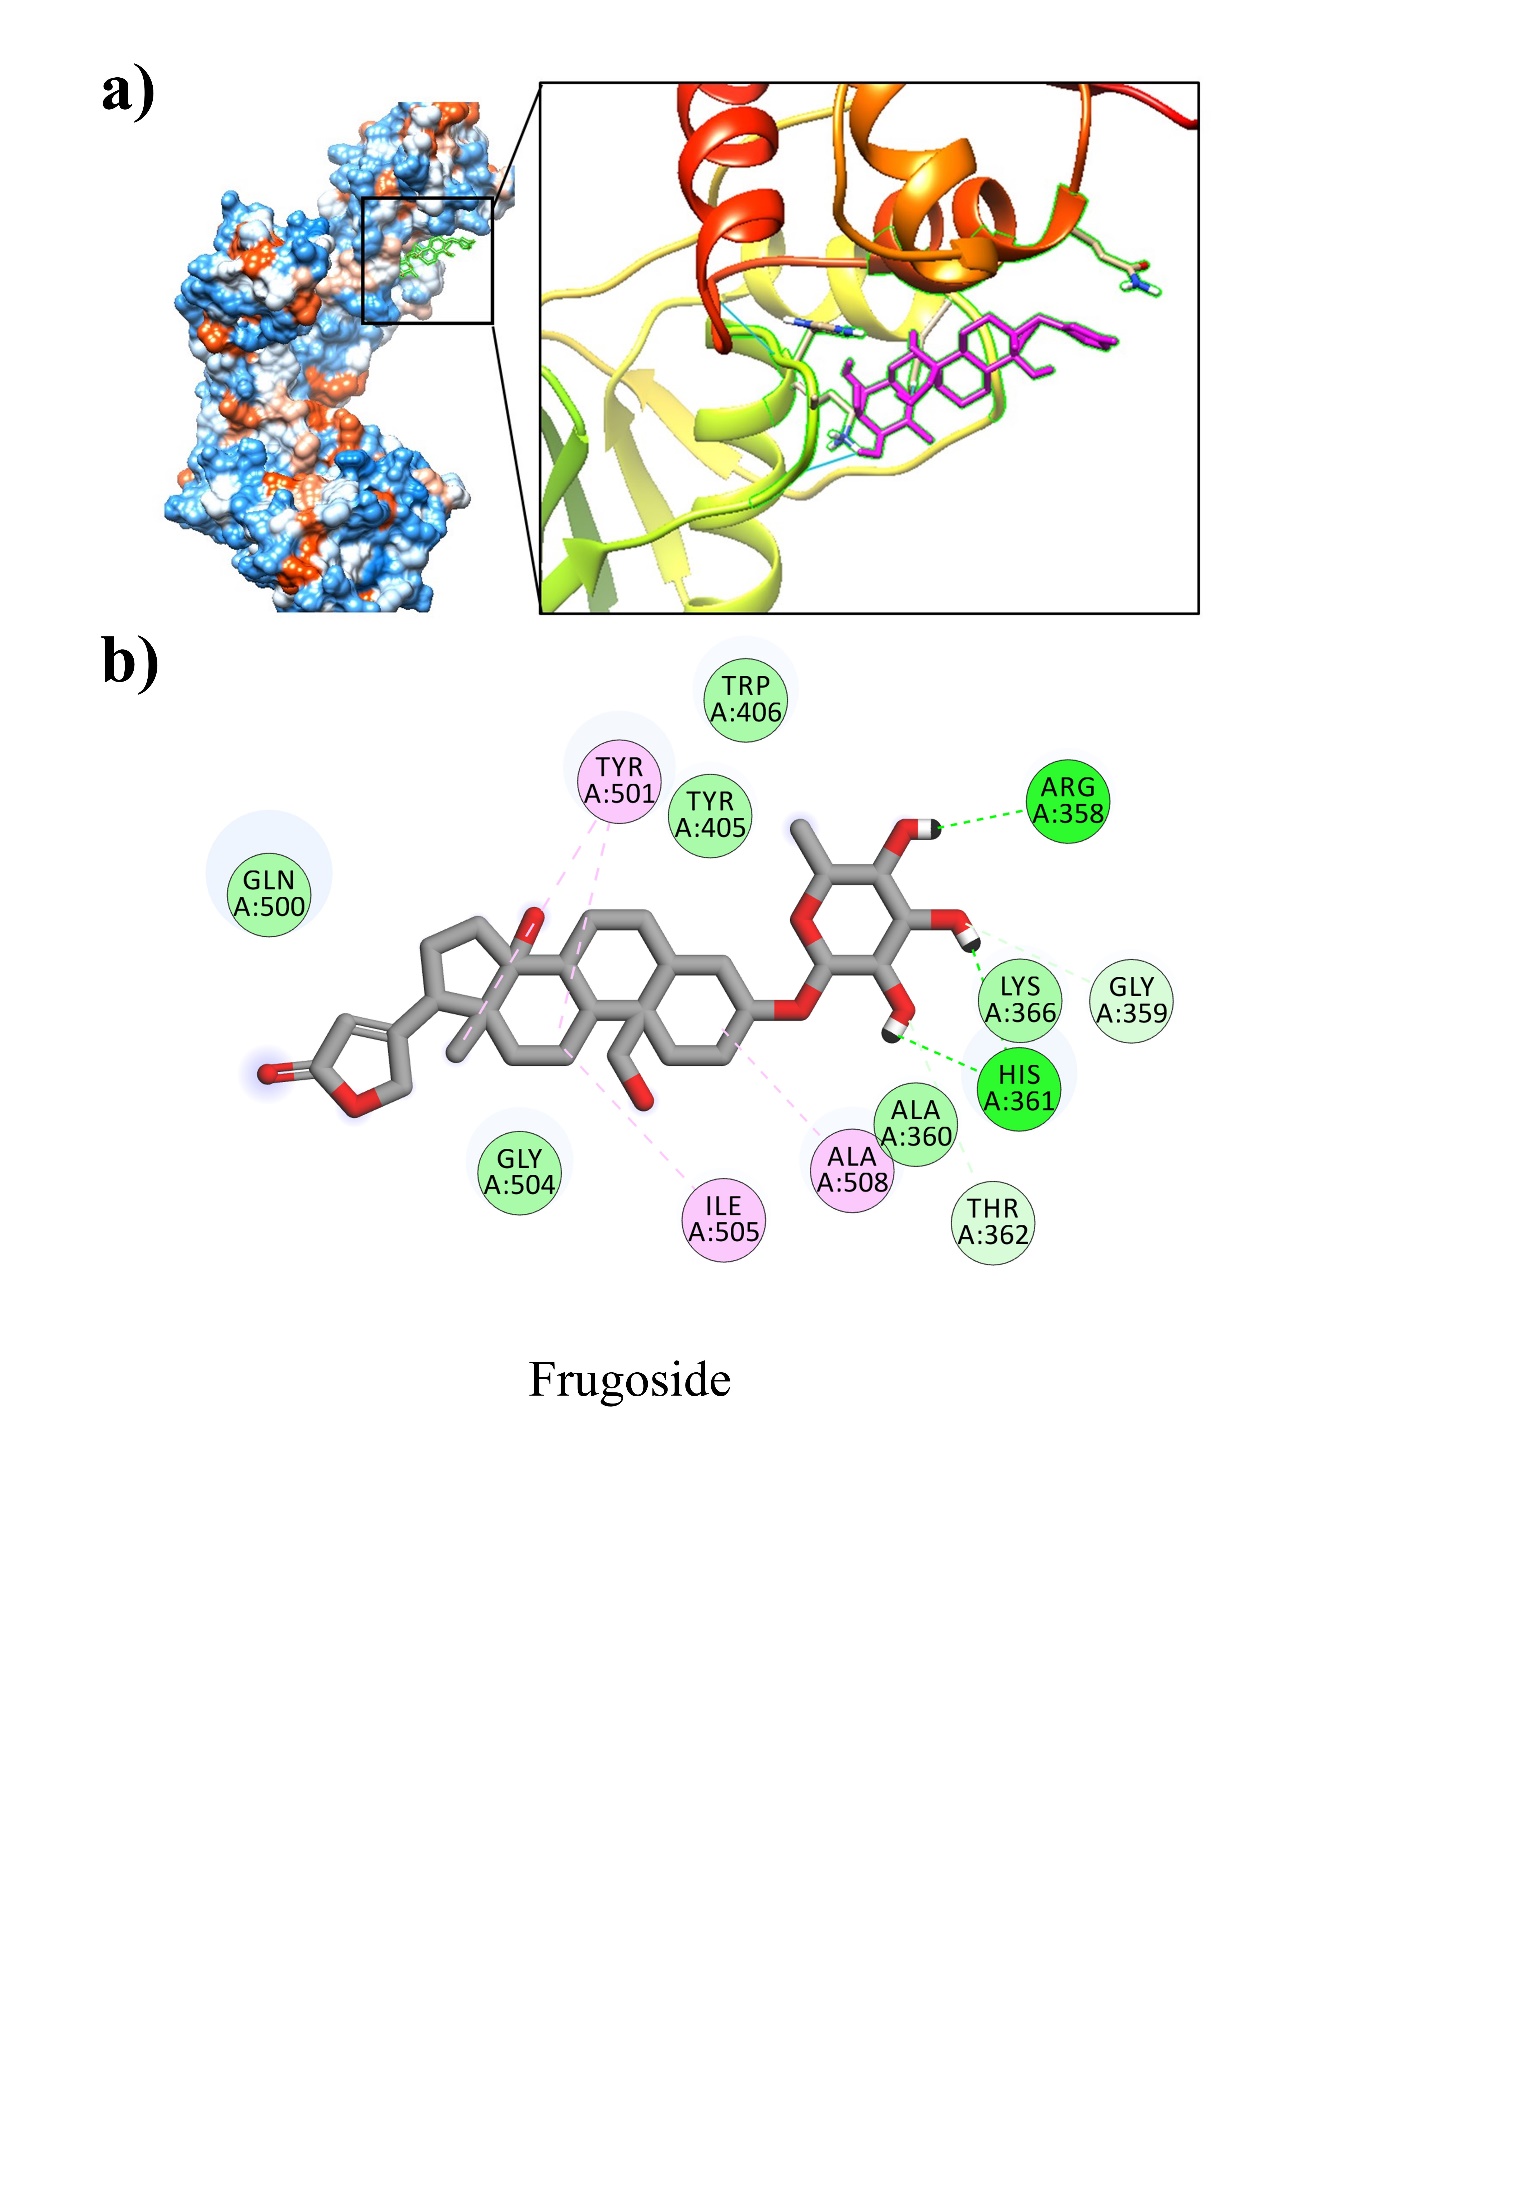


**Supplementary Fig. 6** Binding mode for Frugoside with HIV-1 RT (PDB ID 1JLB)

1. Ligand is shown in "Stick" format and green color whereas the HIV-1 RT is shown in "Surface" format. b) 2D images generated using discovery studio 4.1 Visualizer showing amino acid residues involved in interactions between ligand and enzyme.


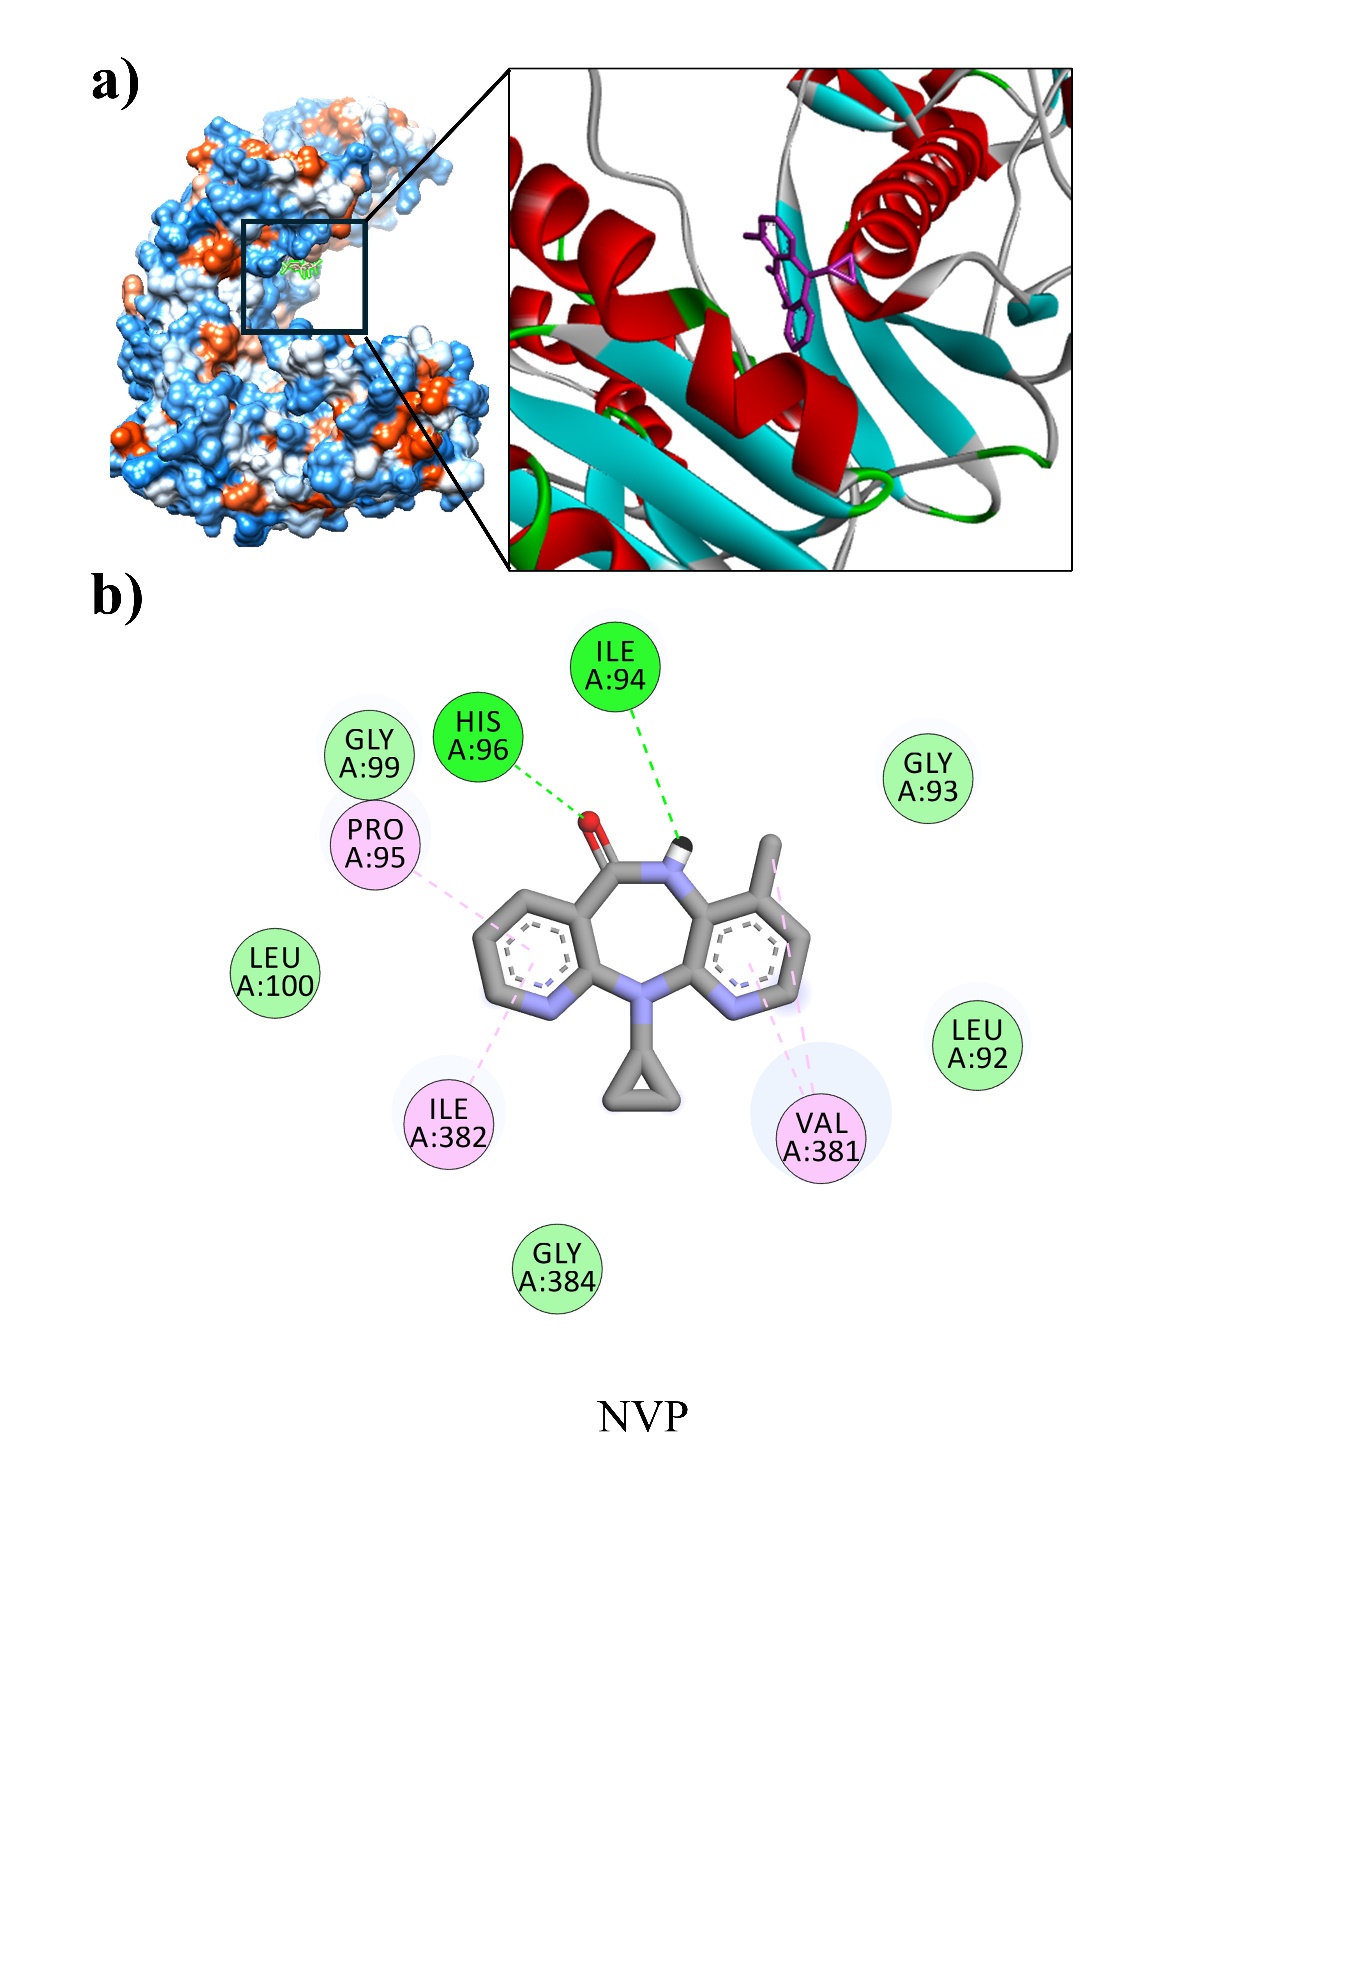


**Supplementary Fig. 7** Binding mode for Nevirapine (reference drug) with HIV-1 RT (PDB ID 1JLB)

a) Ligand is shown in "Stick" format and green color whereas the HIV-1 RT is shown in "Surface" format. b) 2D images generated using discovery studio 4.1 Visualizer showing amino acid residues involved in interactions between ligand and enzyme.
